# Supplementary material for: In Hepatocellular Carcinoma miR-221 Modulates Sorafenib Resistance through Inhibition of Caspase-3–Mediated Apoptosis
Source: Oxford University Press journal article supplement (doi:10.1158/1078-0432.ccr-16-1464), 2017-01-17
Supplement: 10780432ccr161464-sup-167502_2_supp_3761999_chcccc.doc [file 10780432ccr161464-sup-167502_2_supp_3761999_chcccc.doc]

### Supplementary Material

**Supplementary Table S1**. Characteristics of surgical HCC patients analysed in this study.

| **Serial N.** | **Gender** | **Age** | **Cause of liver disease (1)** | **Focality (2)** | **Size (3)** | **AFP (4)** | **Grading (5)** |
| --- | --- | --- | --- | --- | --- | --- | --- |
| 1 | M | 60 | Ethanol | uni | 1.8 | 156 | G4 |
| 2 | M | 70 | HCV | multi | 2.3 | 46 | G3 |
| 3 | M | 59 | HCV | uni | 5.0 | 86 | G3 |
| 4 | M | 65 | HCV+Ethanol | uni | 3.0 | 20 | G3 |
| 5 | M | 78 | HCV | uni | 3.0 | 9 | G2 |
| 6 | M | 67 | None | multi | 6.0 | 18766 | G3 |
| 7 | M | 70 | HCV | uni | 4.0 | 35 | G3 |
| 8 | M | 74 | HCV+BAb | uni | 3.0 | 134 | G3 |
| 9 | F | 65 | HCV | uni | 3.0 | 3 | G3 |
| 10 | F | 59 | HCV | uni | 6.0 | 7 | G4 |
| 11 | M | 52 | None | uni | 5.0 | 5 | G2 |
| 12 | M | 81 | HCV | multi | 3.0 | 210 | G3 |
| 13 | F | 80 | HCV | uni | 5.0 | 76 | G3 |
| 14 | M | 72 | HCV | multi | 3.4 | 18 | G3 |
| 15 | M | 59 | HCV | multi | 3.0 | 76 | G2 |
| 16 | F | 73 | None | uni | 5.5 | 2 | G3 |
| 17 | M | 54 | HBV | uni | 4.0 | 162 | G2 |
| 18 | M | 77 | HCV | uni | 2.2 | 48 | G2 |
| 19 | M | 68 | HCV | multi | 2.5 | 5 | G2 |
| 20 | M | 74 | HCV | uni | 3.5 | 2198 | G3 |
| 21 | M | 74 | HCV+HBV | multi | 5.0 | 75 | G4 |
| 22 | M | 49 | HBV | multi | 4.0 | 2708 | G4 |
| 23 | F | 62 | HCV | multi | 3.0 | 468 | G2 |
| 24 | M | 66 | HCV | multi | 3.0 | 58 | G2 |
| 25 | F | 74 | HBV | uni | 3.0 | 186 | G2 |
| 26 | M | 62 | HBV | uni | 5.0 | 8 | G3 |
| 27 | F | 68 | HBV | uni | 3.0 | ND | G3 |
| 28 | M | 72 | HCV | uni | 3.8 | 6 | G2 |
| 29 | F | 71 | HCV | uni | 10.0 | 11302 | G4 |
| 30 | M | 75 | HCV | multi | 2.2 | 57 | G3 |
| 31 | M | 68 | HBV | uni | 3.8 | 430 | G4 |
| 32 | M | 65 | None | uni | 6.1 | 390 | G3 |
| 33 | F | 66 | HCV | uni | 2.2 | 12 | G3 |
| 34 | M | 72 | HCV | multi | 3.4 | 18 | G3 |
| 35 | M | 75 | HCV | multi | 7.0 | 9 | G3 |
| 36 | M | 67 | HCV | uni | 3.0 | 9 | G2 |
| 37 | M | 69 | HCV | multi | 2.5 | 5 | G3 |
| 38 | F | 69 | HCV | uni | 2.5 | 24.5 | G3 |
| 39 | F | 65 | HCV | uni | 3.0 | 3 | G1 |
| 40 | M | 73 | None | uni | 7.0 | 86 | G4 |
| 41 | M | 70 | HCV+HBV | uni | 7.0 | 486 | G4 |
| 42 | M | 77 | HCV+Ethanol | uni | 2.2 | 48 | G3 |
| 43 | M | 68 | HCV | multi | 8.0 | 86 | G3 |
| 44 | M | 74 | HCV+HBV | uni | 3.0 | 134 | G3 |
| 45 | M | 67 | None | multi | 6.0 | 18764 | G3 |
| 46 | M | 51 | HCV+HBV | multi | 7.0 | 1924 | G3 |
| 47 | M | 76 | HCV | multi | 10.0 | 7.5 | G3 |
| 48 | M | 52 | None | uni | 5.0 | 5 | G3 |
| 48 | M | 81 | HCV | multi | 3.0 | 210 | G3 |
| 49 | M | 65 | HBV+Ethanol | uni | 3.0 | 5 | G2 |
| 50 | M | 79 | HBV | multi | 7.0 | 540 | G4 |
| 51 | M | 70 | HCV | multi | 2.3 | 46 | G3 |
| 52 | F | 82 | HCV | uni | 7.5 | 67 | G3 |
| 53 | M | 76 | HBV | multi | 5.0 | 10000 | G4 |
| 54 | M | 66 | HCV | multi | 3.0 | 58 | G3 |
| 55 | M | 49 | HBV | multi | 4.0 | 2708 | G4 |
| 56 | F | 46 | HCV | multi | 7.0 | 139313 | G4 |
| 57 | M | 70 | None | multi | 10.0 | 11 | G3 |
| 58 | F | 77 | HCV+Ethanol | uni | 8.0 | 9572 | G3 |
| 59 | F | 71 | HCV | uni | 2.0 | 274 | G3 |
| 60 | M | 75 | None | multi | 15 | 6 | G3 |

1. Cause of underlying liver disease: HBV: Hepatitis B Virus; HCV: Hepatitis C Virus; Ethanol: History of ethanol abuse; HBV-Ab: presence of the antibodies against HBV; None: negative history for hepatitis virus infection and ethanol abuse.
2. Focality: uni-or multifocality was assessed by means of imaging techniques prior to surgery and intra-operative ultrasound.
3. Size of the HCC nodule (in centimeters) used for RNA and caspase-3 assays.
4. AFP: alpha-feto-protein determination was made prior to surgery and is expressed in ng/mL.
5. Grading of the HCC was assessed according to Edmondson and Steiner’s criteria.

**Supplementary Table S2**. Patients assessed for circulating miR-221.

|  |  | Training set (N=50) (1) | Validation set (N=43) (1) | Difference |
| --- | --- | --- | --- | --- |
| Age |  |  |  |  |
|  | <65 yrs | 7 (14%) | 10 (23.3%) | n.s. |
|  | >65 yrs | 43 (86%) | 33 (76.7%) | n.s. |
| Gender |  |  |  |  |
|  | Male | 39 (78%) | 32 (74.4%) | n.s. |
|  | Female | 11 (22%) | 11 (25.6%) | n.s. |
| Viral infection |  |  |  |  |
|  | HBV | 3 (6%) | 5 (11.6%) | n.s. |
|  | HCV | 37 (74%) | 33 (76.8%) | n.s. |
|  | None | 10 (20%) | 5 (11.6%) | n.s. |
| Stage of HCC |  |  |  |  |
|  | intermediate | 9 (18%) | 4 (9.3%) | n.s. |
|  | advanced | 41 (82%) | 39 (90.7%) | n.s. |
| Child-Pugh |  |  |  |  |
|  | A5 | 18 (36%) | 12 (27.9%) | n.s. |
|  | A6 | 32 (64%) | 31 (72.1%) | n.s. |
| Portal vein invasion (2) |  |  |  |  |
|  | Yes | 7 (14%) | 6 (13.9%) | n.s. |
|  | No | 43 (86%) | 37 (86.1%) | n.s. |

(1) The two patients’ cohorts are independent.

(2) Assessed at imaging techniques

**Supplementary Table S3.** Primer sequences and PCR conditions for the cloning experiment.

| **Cloned fragment** | **RT-PCR Primer Sequences** | **Amplified product (bp)** | **Anneling T (°C)** | **Cycles (N.)** |
| --- | --- | --- | --- | --- |
| *CASP3*-3’UTR | Fw 5’-AAAC**TCTAGA**AATGATGATGTGGAAGA-3’  Rv 5’-ATGCCG**TCTAGA**GTCCTATGTGC-3’ | 885 | 61.0 | 35 |

# **Supplementary Table S4.** Primer sequences and PCR conditions.

| Gene name | **Species** | **Primer Sequences** | **PCR product (bp)** | **Anneling T (°C)** | **Cycles** | Analysis |
| --- | --- | --- | --- | --- | --- | --- |
| CASP3 | Homo sapiens | Fw 5’-ACTGGACTGTGGCATTGAG-3’  Rv 5’-GAGCCATCCTTTGAATTTCGC-3’ | 135 | 60 | 27  50 | RT-PCR  qPCR |
| ***ß-ACTIN*** | Homo sapiens | Fw 5’- ACCTTCTACAATGAGCTGCG -3’  Rv 5’- CCTGGATAGCAACGTACATGG -3’ | 148 | 58 | 25  50 | RT-PCR  qPCR |
| ***CASP3*** | Rattus Norvegicus | Fw 5’-ATCAAAGCTTAGTGTCCTGAGG-3’  Rv 5’-TCCATCGACTTGCTTCCATG-3’ | 135 | 61.8 | 45 | qPCR |
| ***BMF*** | Rattus Norvegicus | Fw 5’-GAGGTACAGATCGCCAGAAAG-3’  Rv 5’-TCCCTGTTTTCTCGTCTGTTC-3’ | 149 | 61.8 | 45 | qPCR |
| ***AFP*** | Rattus Norvegicus | Fw 5’-AAAGACCAGGATCAGGAAGC-3’  Rv 5’-CCATCAAACCGAAAAGCTCAC-3’ | 150 | 62.0 | 45 | qPCR |
| ***c-MYC*** | Rattus Norvegicus | Fw 5’-CTCGCGTTATTTGAAGCCTG-3’  Rv 5’-TCGCAGATGAAATAGGGCTG-3’ | 136 | 61.8 | 45 | qPCR |
| ***EpCAM*** | Rattus Norvegicus | Fw 5’-GCTGAGATAAAGGAGATGGGTG-3’  Rv 5’-AGGTCTATCCGTTTGCAACC-3’ | 129 | 58.0 | 45 | qPCR |
| ***CK19*** | Rattus Norvegicus | Fw 5’-TTCCGTGATTACAGCCAGTAC-3’  Rv 5’-TTCTGTCTCAAACTTGGTCCG-3’ | 146 | 61.8 | 45 | qPCR |
| ***ß-ACTIN*** | Rattus Norvegicus | Fw 5’-CACTTTCTACAATGAGCTGCG-3’  Rv 5’-CTGGATGGCTACGTACATGG-3’ | 147 | 60 | 45 | qPCR |

|  | | | | |
| --- | --- | --- | --- | --- |
|  |  |  |  |  |
|  |  |  |  |  |
|  |  |  |  |  |

# **Supplementary Table S5.** Antibodies used in Western blot analysis.

| Antibody | **Catalogue Number** | **Company** |
| --- | --- | --- |
| **Caspase-3** | #9662 | Cell Signaling |
| **Cleaved caspase-3 (Asp175)** | #9661 | Cell Signaling |
| **Puma** | #4976 | Cell Signaling |
| **Bax** | #2772 | Cell Signaling |
| **PARP** | #9542 | Cell Signaling |
| **Caspase-7** | #9492 | Cell Signaling |
| **β-actin (C4)** | #sc-47778 | Santa Cruz |

**Supplementary Figure Legends.**

**Figure S1**. Schematic flow chart of HCC patients.

**Figure S2**. Histopathological images of HCC nodules arisen in DEN-treated rats following Sorafenib administration. Nodules that responded to Sorafenib displayed large necrotic areas.

**Figure S3**. (**A-C**) Box plot graphs of *AFP*, *MYC* and CK19 mRNAs expression in DEN-treated rats following Sorafenib administration. HCC nodules were divided in responder and non-responder groups on the basis of Sorafenib sensitivity. Y-axis reports the 2-Ct values relative to mRNAs expression, transformed in a log2 form. (**D**) Correlation graph between tumor size (Y-axis) and tumor mass doubling time (X-axis) in the xenograft mouse model. (**E**)Correlation between extracellular and intracellular miR-221 levels in the DEN-HCC rat model; more nodule for each rat were considered in this analysis (N=19). X and Y-axes report the 2-Ct values corresponding to intra-tumor and circulating miR-221 levels. (**F**) Bar chart representative of protein expression in the DEN HCC rat model. Columns represent mean ± SD values relative to immunoblot quantification of three different WB replicates. (**G**) Correlation graph between miR-221 expression and Bmf mRNA (N=24) levels in the DEN-HCC rat model. X and Y-axes report the 2-Ct values corresponding to miR-221 levels and Bmf mRNA levels. All values are transformed in a log2 form. (**H**) Correlation between caspase-3 and Bmf mRNA levels in the DEN-HCC rat model (N=24). X and Y-axes report the 2-Ct values corresponding to caspase-3 and Bmf mRNA levels. All values are transformed in a log2 form. (**I**) WB analysis of caspase-3 and BMF expression in HepG2 and SNU449 cells following miR-221 transient modulation and BMF or caspase-3 specific silencing. BMF si: BMF small interfering RNA; casp3 si: caspase-3 small interfering RNA. Β-actin was used as housekeeping gene. Numbers represent the ratio between gene expression and β-actin expression. (**L**) QPCR analysis of miR-221 expression in 14 human HCCs and surrounding cirrhotic tissues (LC), 3 HCC cell lines and eight normal livers (NL). RNU6B was considered as housekeeping gene. Y-axis reports normalized 2-Ct values corresponding to miR-221 expression. The mean value of miR-221 in control livers was used to normalize all the other samples.

**Figure S4**. (**A, E**) Box plot graphs of serum AFP in HCC patients with high and low miR-221 or caspase-3 expression levels. High and low miR-221 or caspase-3 expression was identified on the basis of the median value. Y-axis reports the 2-Ct values relative to AFP quantification, transformed in a log2 form. (**B, F**) Box plot graphs of tumor size in HCC patients with high and low miR-221 or caspase-3 expression levels. High and low miR-221 or caspase-3 expression was identified on the basis of the median value. Y-axis reports the tumor size values (cm). (**C, G**) Box plot graphs of miR-221 or caspase-3 levels in HCC patients divided based on tumor etiology. Y-axis reports the 2-Ct values of miR-221 or caspase-3 expression, transformed in a log2 form. (**D, H**) Box plot graphs of miR-221 or caspase-3 levels in HCC patients divided based on tumor grade. Low grade: G1 + G2; high grade: G3 + G4. Y-axis reports the 2-Ct values of miR-221 or caspase-3 expression, transformed in a log2 form.
